# Supplementary material for: Electrospinning construction of a Fe–Ni-based multicomponent hybrid as synergistic electrocatalyst for water electrolysis
Source: Royal Society of Chemistry journal article supplement (doi:10.1039/d3se01379k), 2024-01-01
Supplement: d3se01379k1.pdf [file d3se01379k1.pdf]

1

## Supporting information

### 2 1. Materials

3 Ni(NO<sub>3</sub>)<sub>2</sub>·6H<sub>2</sub>O, Fe(NO<sub>3</sub>)<sub>3</sub>·9H<sub>2</sub>O, o-phenyldiamine, polyacrylonitrile,  
4 salicylaldehyde and RuO<sub>2</sub> were purchased from Aladdin chemical reagent company.  
5 Nafion (5 wt %) were supplied by Alfa Aesar. All reagents were of analytical grade and  
6 were used as received.

### 7 2. Catalyst Characterization

8 The X-ray powder diffraction (XRD) patterns of the samples were obtained on a  
9 Shimadzu XRD-6000 diffractometer with Cu K<sub>α</sub> radiation (λ=1.54178 Å). Scanning  
10 electron microscope (SEM) images were collected using a field-emission scanning  
11 electron microscope (JSM-6701F, FEOL). Transmission electron microscopy (TEM)  
12 images were taken with a JEM-2010 transmission electron microscope. The nitrogen  
13 adsorption-desorption characterization was performed with an ASAP2020  
14 micrometrics instrument at 77 K. Autosorb-iQ2-MP nitrogen adsorption specific  
15 surface area analyzer was used to measure the specific surface area and pore size  
16 distribution of samples. The X-ray photoelectron spectroscopy (XPS) was obtained at  
17 a Thermo Fisher Scientific's K<sub>α</sub> X-ray photoelectron spectrometer.

### 18 3. Electrochemical Measurements

#### 19 3.1 For HER and OER

20 The electrochemical performance of the product was characterized by an  
21 electrochemical workstation CHI760E (CH Instrument, Shanghai, China). The  
22 electrochemical tests of HER and OER was carried out in a three-electrode system using  
23 Ag/AgCl (in 3.0 M KCl) as the reference electrode, a carbon rod as the counter  
24 electrode, and a glassy carbon (GC) electrode coated with the products as the working  
25 electrode. 1.0 M KOH was used as the electrolyte. The first step was the preparation of  
26 the working electrode. After the catalyst is thoroughly ground, 5 mg of the catalyst was  
27 dispersed in a mixed solution of water (100 μL), alcohol (400 μL), and Nafion solution  
28 (5 μL, 10 wt %) to form homogeneous ink via a continuous sonication treatment for 30  
29 min. The working electrode was prepared by dripping 5.0 μl catalyst ink on the polished  
30 surface of the electrode, which was air-dried naturally to obtain a loading of 0.70 mg

31 cm<sup>-2</sup>. For comparison purpose, electrocatalytic activity of commercial Pt/C (for HER  
 32 comparison) and RuO<sub>2</sub> (for OER comparison) were evaluated when the loading was  
 33 0.70 mg cm<sup>-2</sup> under the same conditions. The cyclic voltammetric (CV) pretreatment  
 34 was arranged before other tests to activate the electrocatalysts and achieve a stable state  
 35 of the material. The voltage range of the CV scan was 1.0-2.0 V (vs RHE); the scan rate  
 36 was 50 mV s<sup>-1</sup>. The linear sweep voltammetric (LSV) was measured at a scan rate of  
 37 10 mV s<sup>-1</sup>, the overpotential ( $\eta$ ) for HER can be calculated from a formula  $\eta = E$  (vs  
 38 Ag/ AgCl) + 0.059 pH + 0.197 V. The overpotential ( $\eta$ ) for OER can be calculated from  
 39 a formula  $\eta = E$  (vs Ag/ AgCl) + 0.059 pH + 0.197 V - 1.23 V. Electrochemical  
 40 impedance spectra (EIS) were recorded at 0.6 V vs Ag/AgCl in the frequency range  
 41 0.1-100 000 Hz with an amplitude of 10 mV.

### 42 3.2 Determination of Electrochemical Capacitance

43 The electrochemical surface area (ECSA) was estimated by CV scan in the non-  
 44 faradaic potential range (0.4-0.45 V vs RHE) at different scan rates (5, 10, 15, 20, and  
 45 25 mV s<sup>-1</sup>). By plotting the current density difference ( $\Delta j$ ) between the anodic and  
 46 cathodic current densities against the scan rate, the linear slope (i.e., twice of the double  
 47 layer capacitance ( $C_{dl}$ )) was used to represent ECSA.

### 48 3.3 Turnover frequency (TOF) calculation

49 In order to calculate the turnover frequency (TOF) of the surface active sites, CV  
 50 test was performed with the potential range of -0.2 to 0.6 V (vs. RHE) at a scan rate of  
 51 50 mV s<sup>-1</sup> to obtain the number of active sites in 1.0 M PBS (pH = 7). With a given  
 52 geometric area  $A$ , the number of effective sites  $n$  is proportional to the charge  $Q$ , and  
 53 the charge  $Q$  can be calculated from the obtained CV curve by integration. Therefore,

$$\begin{aligned}
 54 \quad I_{cv} &= J_{cv} \cdot A \\
 &\quad \frac{U_{cv}}{t = v} \\
 55 \quad Q &= 2 \int (I_{cv} t) = 2 \int d \left( \frac{U_{cv}}{v} J_{cv} \right) = 2 \int v d(U_{cv} J_{cv} A) = 2v \int dU_{cv} J_{cv} = \frac{SA}{2v}
 \end{aligned}$$

56 Because the charge  $Q$  of surface active sites ( $n$ ) can be described by  $Q = nF$ ,

59 therefore,

$$n = \frac{SA}{2vF}$$

61 Where  $I_{cv}$ ,  $J_{cv}$ ,  $U_{cv}$  are the current, current density, and potential obtained from CV  
62 curve,  $v$  is the scan rate, and  $S$  is the integrated area of CV curve. When the number of  
63 active sites is determined, the TOF ( $s^{-1}$ ) was calculated with the equation:

$$64 \quad \text{HER: TOF} = \frac{I}{2nF} = \frac{I}{2F} \frac{2vF}{SA} = \frac{vI}{SA} = \frac{Jv}{S}$$

$$65 \quad \text{OER: TOF} = \frac{I}{4nF} = \frac{I}{4F} \frac{2vF}{SA} = \frac{vI}{2SA} = \frac{Jv}{2S}$$

66 where  $I$  is the current (in  $A$ ) for different samples during the LSV measurements in  
67 1.0 M KOH,  $J$  is the current density in LSV curves,  $v$  is the scan rate,  $F$  is the Faraday  
68 constant (in  $C mol^{-1}$ ), and  $n$  is the number of active sites (in  $mol$ ) for different samples,  
69 and  $S$  is the integrated areas of CV curves.

#### 70 3.4 For overall water splitting

71 Preparation of electrode: 5 mg catalyst was ultrasonically dispersed into a mixture  
72 of 100  $\mu$ L ethanol and 400  $\mu$ L distilled water until the dispersion was uniform. 350  $\mu$ L  
73 of catalyst was coated to two pieces of processed nickel foam ( $1 \times 1$  cm), respectively,  
74 and dried naturally at room temperature for testing. For comparison purpose,  
75 electrocatalytic activity of commercial Pt/C (for cathode) and  $RuO_2$  (for anode) were  
76 evaluated under the same conditions.

77

78 4. Results and Discussion

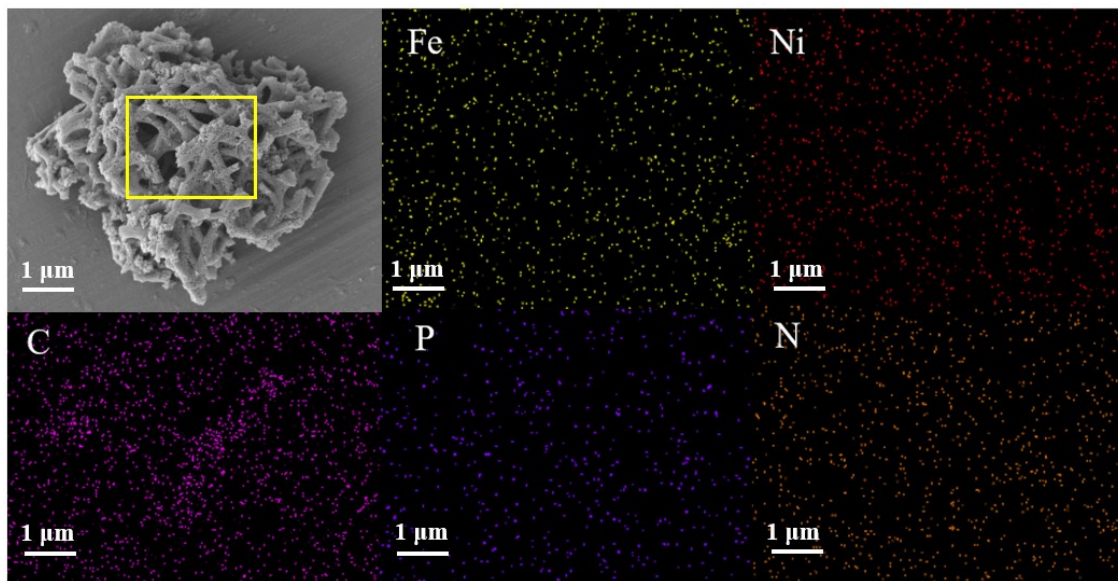

79

80 **Fig. S1** SEM image and the selected area EDS mapping of the FNNP/NCF-1:3.

81

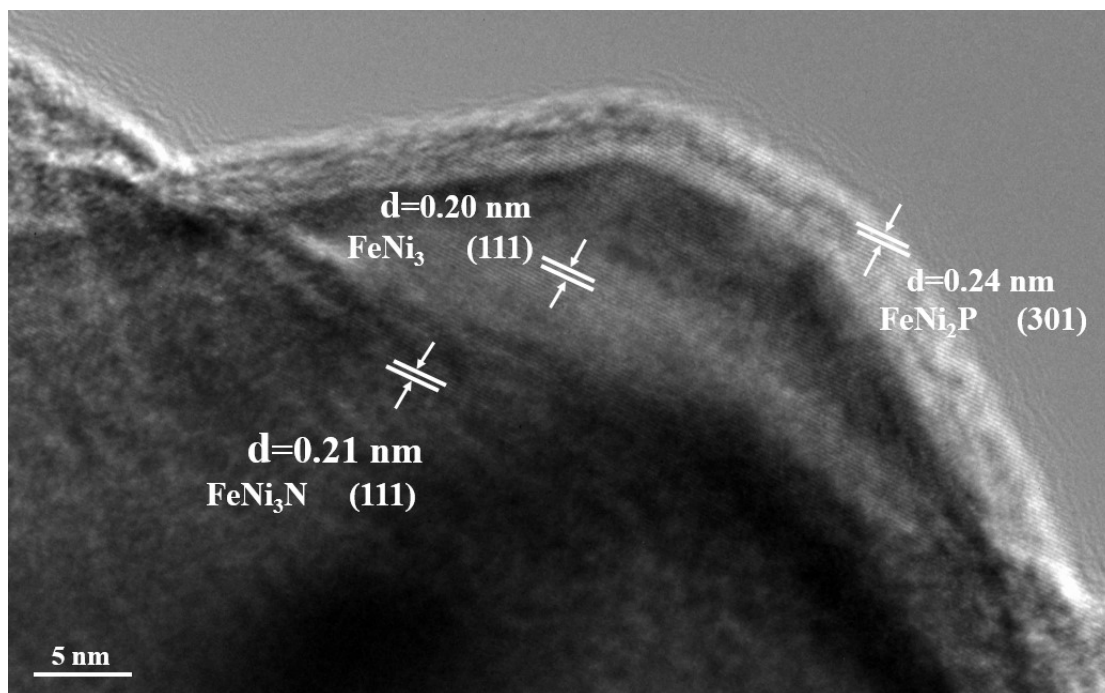

82

83 **Fig. S2** The high-resolution TEM image of the FNNP/NCF-1:3.

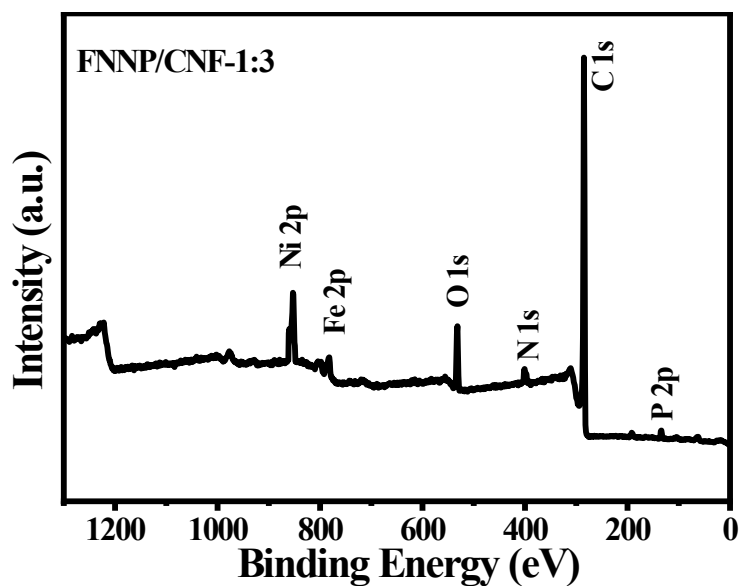

84

85

Fig. S3 The full survey XPS spectra of FNNP/NCF-1:3.

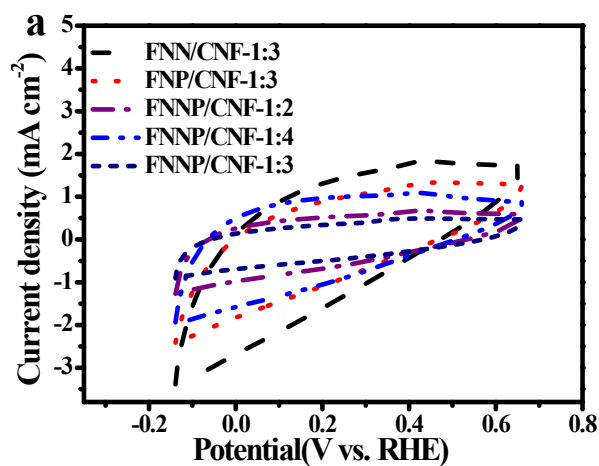

86

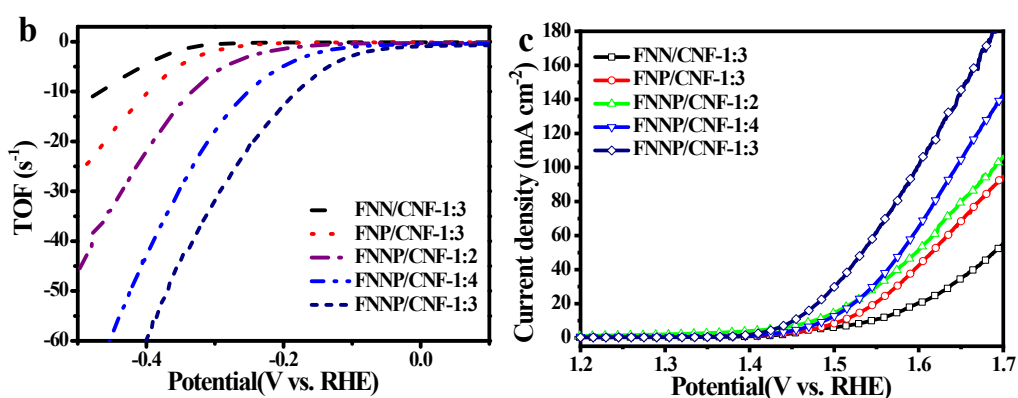

87

88 Fig. S4 (a) CV curves of the catalysts in 1.0 M PBS (pH=7) with a scan rate of 50 mV

89 s<sup>-1</sup>. TOF of the catalysts for HER (b) and OER (c) in 1.0 M KOH.

90

**Table S1** Summary of Fe/Ni composite materials for HER in 1.0 M KOH.

| Catalyst                                            | Overpotential<br>(mV) at 10<br>mA cm <sup>-2</sup> | Overpotential<br>(mV) at 100<br>mA cm <sup>-2</sup> | Refs.                                             |
|-----------------------------------------------------|----------------------------------------------------|-----------------------------------------------------|---------------------------------------------------|
| <sup>a</sup> P-NiMo <sub>4</sub> N <sub>5</sub> @Ni | 178                                                | 307                                                 | Appl. Catal. B Environ.<br>S0926-3373(18)30960-3. |
| <sup>b</sup> NiYCe-MOF/NF                           | 197                                                | 387                                                 | Nano Lett. 2022, 22,<br>7238–7245                 |
| <sup>c</sup> Ni-Mo-Fe (NMF-6)                       | 344                                                | 408                                                 | Int. J. Hydrogen. Energy.<br>46 (2021) 3821-3832. |
| <sup>d</sup> NiFe-LDH/Ni(OH) <sub>2</sub>           | 157                                                | 275                                                 | Chem. Eng. J. 419 (2021)<br>129608                |
| <sup>e</sup> Ni(OH) <sub>2</sub> /NF                | 197                                                | 276                                                 | Sustain. Energ. Fuels.<br>2020, 4, 5031–5035      |
| <sup>f</sup> Cu@Cu <sub>3</sub> P/NF                | 218                                                | 302                                                 | Chem.Eur.J.2019,25,1083<br>–1089                  |
| <sup>g</sup> FeNi(BDC)(DMF,F)/NF                    | 171                                                | 264                                                 | Appl. Catal. B Environ.<br>258 (2019) 118023      |
| <sup>h</sup> P-rSWCNT                               | 162                                                | 275                                                 | Appl. Catal. B Environ.<br>298 (2021) 120559      |
| <sup>i</sup> α-CoNiOOH                              | 190                                                | 270                                                 | Dalton T.49 (2020) 16962-<br>16969.               |
| FNN/NCF-1:3                                         | 128                                                | 352                                                 | This work                                         |

92 <sup>a</sup> Hydrothermal preparation of nickel foam loaded with nickel-molybdenum nitride after  
93 ammonification treatment.

94 <sup>b</sup> Preparation of nickel-yttrium cerium nickel foam loaded MOF by hydrothermal  
95 method.

96 <sup>c</sup> Nickel-iron hydroxide loaded on nickel foam, electrodeposited nickel-cobalt metal  
97 after carbonization.

98 <sup>d</sup> Electrodeposition of nickel-iron hydroxide followed by nickel hydroxide on nickel  
99 foam.

100 <sup>e</sup> Nickel foam heating loaded with nickel hydroxide.

101 <sup>f</sup> Nickel foam water bath heated to grow copper oxide, alkaline environment copper

102 oxide reaction to copper hydroxide after phosphorylation.

103 <sup>g</sup> Black foam nickel hydrothermally loaded nickel-iron MOF

104 <sup>h</sup>  $\text{NaH}_2\text{PO}_2 \cdot \text{H}_2\text{O}$  was used as phosphorylated SWCNT as a P source.

105 <sup>i</sup> Preparation of nickel-substituted  $\alpha\text{-Co}(\text{OH})_2$   $\alpha\text{-CoNiOOH}$  sheets by co-precipitation.

106

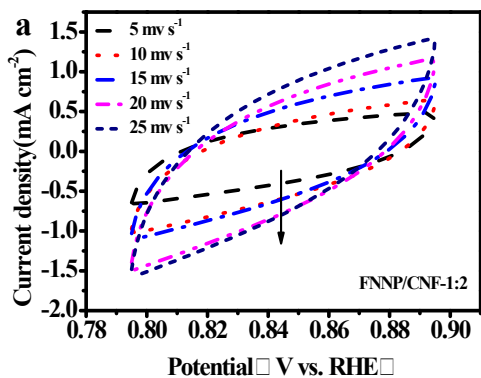

107

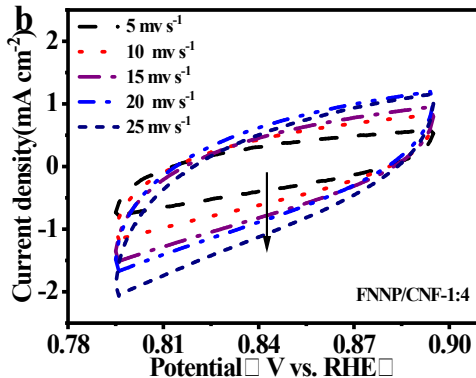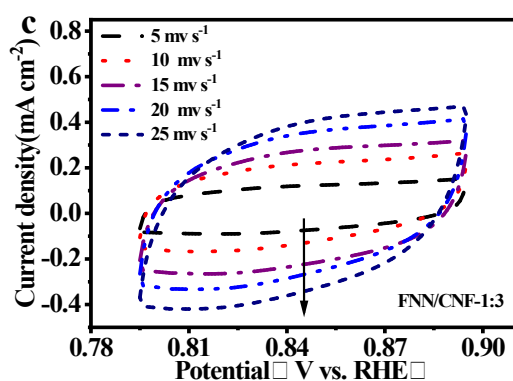

108

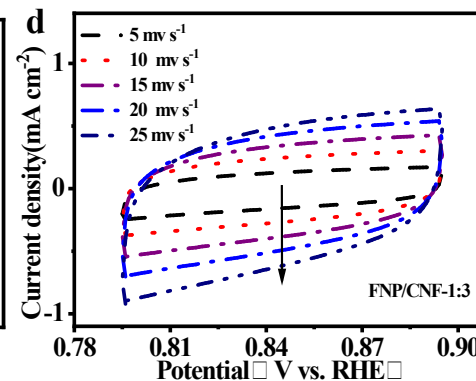

109 **Fig. S5** The CV curves of (a)FNNP/CNF-1:2, (b) FNNP/CNF-1:4, (c) FNN/CNF-1:3,  
 110 (d) FNP/CNF-1:3 in non-Faradaic potential range at different scan rates in 1.0 M  
 111 KOH.



**Table S2** Summary of Fe/Ni composite materials for OER in 1.0 M KOH.

| Catalyst                                                                               | Overpotential<br>(mV) at 10 mA<br>cm <sup>-2</sup> | Overpotential<br>(mV) at 100<br>mA cm <sup>-2</sup> | Refs.                                                |
|----------------------------------------------------------------------------------------|----------------------------------------------------|-----------------------------------------------------|------------------------------------------------------|
| <sup>a</sup> CoNiMo-O/H <sub>2</sub> -450                                              | 293                                                | 359                                                 | Chemelectrochem. 2018,<br>5, 1-9.                    |
| <sup>b</sup> H-Ni <sub>2</sub> Fe <sub>2</sub> N/Ni <sub>3</sub> Fe@N-<br>CS           | 236                                                | 351                                                 | Appl. Surf. Sci. 566<br>(2021) 150706                |
| <sup>c</sup> Ni/MoN@NCNT/CC                                                            | 252                                                | 368                                                 | J. Alloy. Compd. 934<br>(2023) 167846.               |
| <sup>d</sup> Ni(OH) <sub>2</sub> @NiS <sub>2</sub>                                     | 309                                                | 359                                                 | Chemelectrochem. 7<br>(2020) 745-752.                |
| <sup>e</sup> NF/PANI/ NiFeOH                                                           | 170                                                | 340                                                 | Int. J. Hydrogen. Energy.<br>47 (2022) 34025 e34035  |
| <sup>f</sup> NiFe NCs                                                                  | 281                                                | 305                                                 | J. Colloid. Interf. Sci.<br>S0021-9797(18)31294-3    |
| <sup>g</sup> Fe <sub>2</sub> O <sub>3</sub> /Fe <sub>0.64</sub> Ni <sub>0.36</sub> @Cs | 274                                                | 368                                                 | Small 2023, 2208276                                  |
| <sup>h</sup> Ni <sub>3</sub> S <sub>2</sub> /MIL-53(Fe)                                | 214                                                | 251                                                 | Chemistryselect. 6<br>(2021) 1320-1327.              |
| <sup>i</sup> Ru, Ni-CoP                                                                | 251                                                | 360                                                 | Appl. Catal. B Environ.<br>298 (2021) 120488.        |
| <sup>j</sup> Fe <sup>2+</sup> -NiFe-LDH-EO6<br>h@ NF                                   | 239                                                | 285                                                 | ACS Sustain. Chem.<br>Eng. 6 (2018) 11724-<br>11733. |
| FNN/NCF-1:3                                                                            | 222                                                | 369                                                 | This work                                            |

113 <sup>a</sup> Hydrothermal loading of cobalt-nickel-molybdenum precursors with nickel foam  
114 followed by hydrogen reduction

115 <sup>b</sup> Ni<sub>3</sub>[Fe(CN)<sub>6</sub>]<sub>2</sub> PBAs were prepared by hydrothermal method precursors, and then  
116 Ni<sub>3</sub>[Fe(CN)<sub>6</sub>]<sub>2</sub> PBAs precursors were pyrolyzed to synthesize Ni-Fe nitrides and  
117 alloys.

118 <sup>c</sup> Growth of N-doped carbon nanotubes wrapped in Ni/MoN heterostructures on carbon  
119 cloth

- 120 <sup>d</sup> Preparation of Ni(OH)<sub>2</sub>@NiS<sub>2</sub> heterostructures by reflux.
- 121 <sup>e</sup> Electrodeposition of nickel-iron hydroxide after electropolymerization of PANI on  
122 nickel foam.
- 123 <sup>f</sup> Room temperature synthesis of nickel-iron nanocube precursors, phosphorylated after  
124 pyrolysis.
- 125 <sup>g</sup> Room temperature synthesis of Schiff base solution followed by the addition of nickel-  
126 iron metal salt solvent thermal reaction to prepare nickel-iron alloy.
- 127 <sup>h</sup> NiFe foam-loaded Ni<sub>3</sub>S<sub>2</sub>/ MIL-53(Fe).
- 128 <sup>i</sup> PAN oxidation decomposition produces pores to fabricate porous ruthenium-nickel  
129 phosphide nanofibers.
- 130 <sup>j</sup> Growth on nickel foam Fe<sup>2+</sup> -NiFe-LDH.
- 131

133 **Table S3** Summary of Fe/Ni composite materials for overall water splitting in 1.0 M  
 134 KOH.

| Catalyst                                                    | Cell voltage (mV) at 10<br>mA cm <sup>-2</sup> | Refs.                                         |
|-------------------------------------------------------------|------------------------------------------------|-----------------------------------------------|
| <sup>a</sup> FeNiS-NF                                       | 1.54                                           | Catalysts. 9 (2019) 597.                      |
| <sup>b</sup> NiFe <sub>2</sub> O <sub>4</sub> @N-rGO-<br>CC | 1.67                                           | Energ. Fuel. 36 (2022) 4911-<br>4923.         |
| <sup>c</sup> NiFe-Pi/P                                      | 1.57                                           | Appl. Surf. Sci. 598 (2022)<br>153717.        |
| <sup>d</sup> NC <sub>0.9</sub> F <sub>0.1</sub> P HHAs      | 1.57                                           | Electrochim. Acta. 334 (2020)<br>135633.      |
| <sup>e</sup> Fe-CoP UNSs / NF                               | 1.46                                           | J. Mater. Chem. A 7 (2019)<br>20658-20666.    |
| <sup>f</sup> FeNiMoP                                        | 1.50                                           | Sustain. Energ. Fuels. 5 (2021)<br>5789-5797. |
| <sup>g</sup> Co/Fe/Ni(OH) <sub>2</sub>                      | 1.59                                           | Appl. Surf. Sci. 528 (2020)<br>146972.        |
| <sup>h</sup> Ni-Fe-P                                        | 1.66                                           | Appl. Surf. Sci. 561 (2021)<br>150080.        |
| <sup>i</sup> Ni-Fe/S                                        | 1.46                                           | Vacuum. 181 (2020) 109661.                    |
| FNN/NCF-1:3                                                 | 1.47                                           | This work                                     |

135 <sup>a</sup> Nickel-iron sulfide with nickel foam loading.

136 <sup>b</sup> Carbon cloth-loaded NiFe<sub>2</sub>O<sub>4</sub>@N-rGO.

137 <sup>c</sup> Nickel foam loaded nickel-iron phosphide.

138 <sup>d</sup> Nickel foam loaded NC<sub>0.9</sub> F<sub>0.1</sub> P HHAs.

139 <sup>e</sup> Nickel foam loaded Iron-doped cobalt phosphide ultra-thin nanosheets.

140 <sup>f</sup> Trimetallic nickel-iron-molybdenum phosphides grown on nickel foam (NF).

141 <sup>g</sup> Cobalt (Co) and iron (Fe) doped nickel hydroxide (Ni) nanosheets formed on the  
142 surface of nickel foam.

143 <sup>h</sup> Layered nickel-iron-phosphide (Ni-Fe-P) nanosheets grown on nickel foam (NF).

144 <sup>i</sup> A loaded three-dimensional (3D) iron-doped nickel sulfide was prepared on nickel-  
145 iron foam.

146

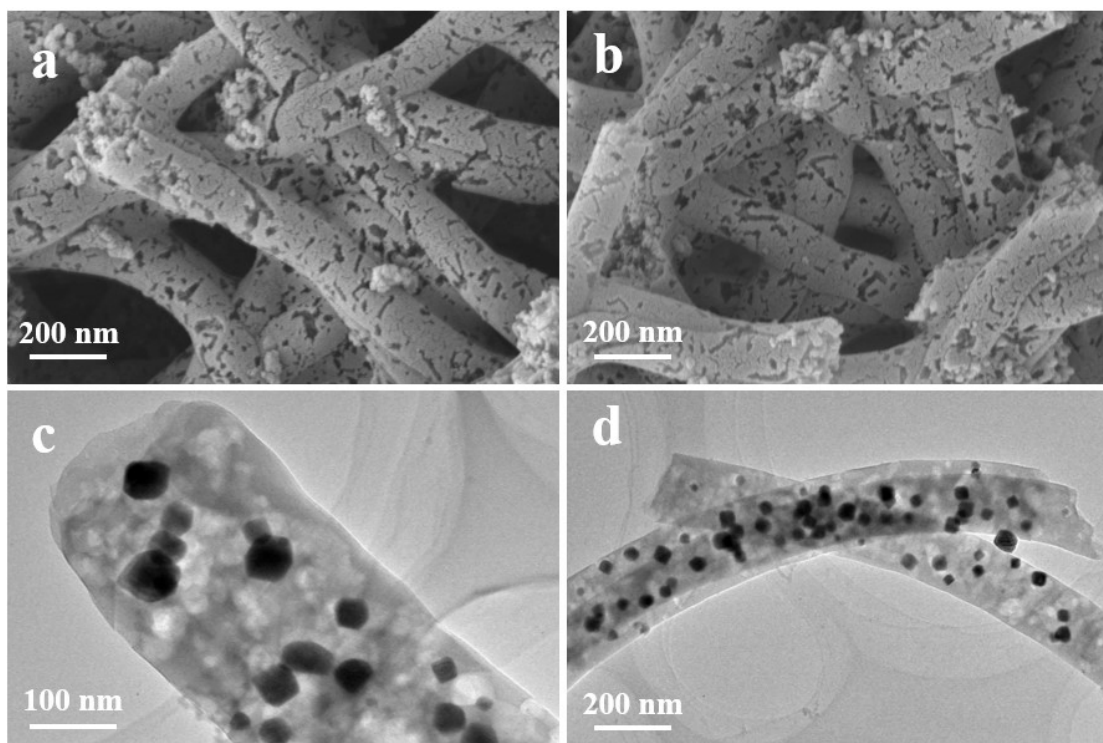

147

148 **Fig. S6** (a) SEM image of FNNP/NCF-1:3 after HER cycle, (b) SEM image of  
149 FNNP/NCF-1:3 after OER cycle, (c) TEM image of FNNP/NCF-1:3 after HER cycle  
150 (d) TEM image of FNNP/NCF-1:3 after OER cycle.

151

152

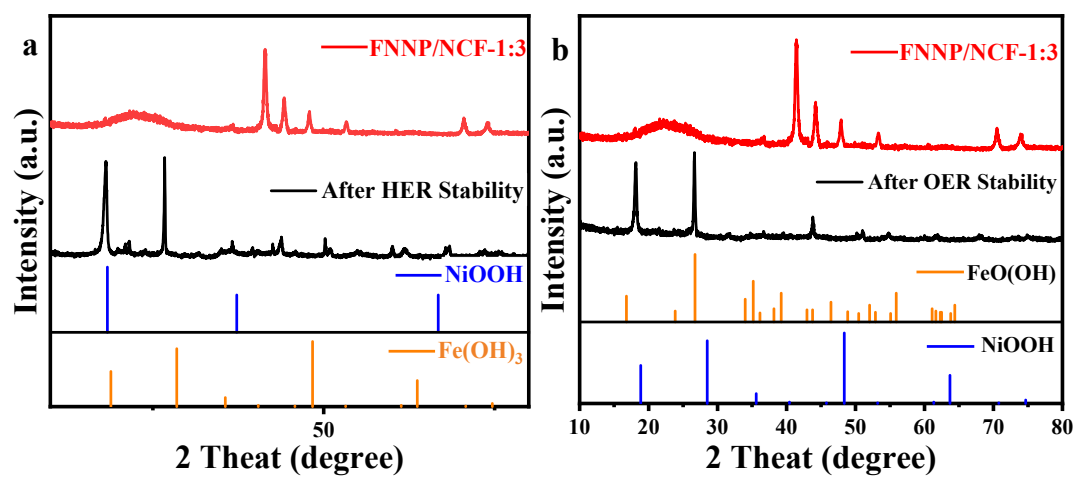

153

154 **Fig. S7** Comparing XRD patterns of the FNNP/NCF-1:3 before and after (a) HER and

155 (b) OER long-time tests.

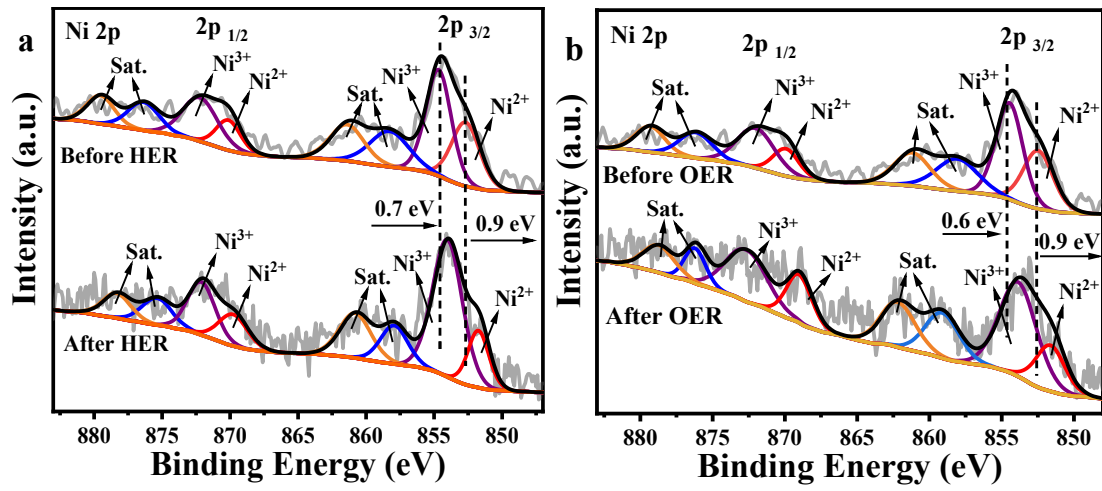

157

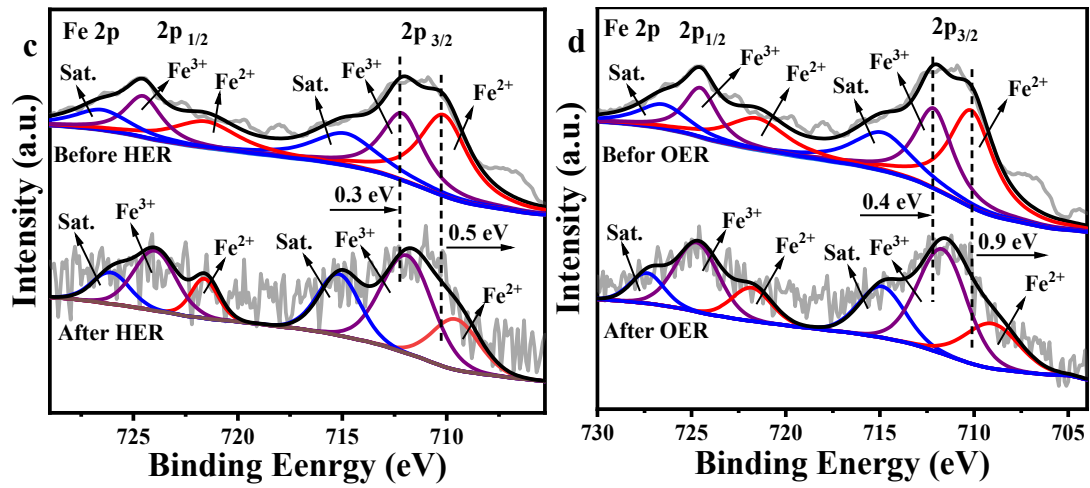

158

159 **Fig. S8** Comparing XPS spectra of (a-b) Ni 2p and (c-d) Fe 2p of patterns of the  
 160 FNNP/NCF-1:3 before and after HER and OER long-time tests.
